# Supplementary material for: A Comprehensive Review of Recent Research into the Effects of Antimicrobial Peptides on Biofilms—January 2020 to September 2023
Source: MDPI journal article supplement (doi:10.3390/antibiotics13040343), 2024-04-09
Supplement: s1 [file s1]

**Supplementary Table S1.** Range of AMPs and sources referenced in this review article.

| AMP Name            | Origin                                                                                                               | Additional Information                           | Number of Publications | Reference |
|---------------------|----------------------------------------------------------------------------------------------------------------------|--------------------------------------------------|------------------------|-----------|
| AMP-17              | AMP derived from <i>Musca domestica</i>                                                                              | MLSTKQLVILGLLGCLSTL<br>QA                        | 2                      | 85, 86    |
| AMPR-11             | AMP derived from Romo1 (reactive oxygen species modulator 1)                                                         | KTMMQSGGTFGTFMAIG<br>MGIR                        | 1                      | 102       |
| Ano-1 $\beta$       | $\beta$ -Ala modified-AMP analogue of anoplin (AMP from the venom of the solitary wasp <i>Anoplius samariensis</i> ) | A $\beta$ LLKRIKTLL                              | 1                      | 11        |
| Ano-8 $\beta$       | $\beta$ -Ala modified-AMP analogue of anoplin (AMP from the venom of the solitary wasp <i>Anoplius samariensis</i> ) | GLLKRIKA $\beta$ LL                              | 1                      | 11        |
| AP7121              | AMP produced by <i>E. faecalis</i>                                                                                   | Sequence not shown in the available publication. | 1                      | 70        |
| As-CATH4            | Cathelicidin identified from Chinese alligator <i>Alligator sinensis</i>                                             | RRGLFKKLRRKIKKGFKKI<br>FKRLPPVGVGVSIPLAGR        | 1                      | 138       |
| As-CATH5            | Cathelicidin identified from chinese alligator <i>Alligator sinensis</i>                                             | TRRKFWKKVLNGALKIAP<br>FLLG                       | 1                      | 138       |
| ASP-1               | Synthetic AMP                                                                                                        | RRWVRRVRRWVR<br>RVVRVRRWVRR                      | 1                      | 133       |
| ASP-2               | Synthetic AMP                                                                                                        | RWWRWWRWRR                                       | 1                      | 133       |
| Bactenecin          | AMP isolated from bovine neutrophils                                                                                 | RLCRIVVIRVCR                                     | 2                      | 137,139   |
| BCp12               | Milk-derived AMP                                                                                                     | YLGYLEQLRLK                                      | 1                      | 64        |
| BiP_Aa_2            | Synthetic AMP derived from Cnidarian moon jellyfish polyps <i>Aurelia aurita</i>                                     | QLFCTKLSPT                                       | 1                      | 104       |
| BiP_Aa_5            | Synthetic AMP derived from Cnidarian moon jellyfish polyps <i>Aurelia aurita</i>                                     | VRNSVLFRRRLVC                                    | 1                      | 104       |
| Block               | Synthetic AMP                                                                                                        | H-<br>KKKKKKKKKGGLLALL<br>ALLA-NH2               | 1                      | 92        |
| BmKn-2 variants     | Variants from AMP from scorpion ( <i>Buthus martensii</i> Karsch) venom                                              | FIGAIARLLSKIF                                    | 1                      | 94        |
| BPIFA1-derived AMP3 | Synthetic AMP derived from BPI fold containing family member A1 (BPIFA1), a human natural defense protein            | PIQGLLDSTLGILNKVLPH<br>LVQGNVCPLVNHVLRGL         | 1                      | 80        |
| Brevinine-1E-OG9    | AMP isolated from skin secretions of the frog <i>Odorrana grahami</i>                                                | FPLIAGLAANFLPKILCKIA<br>RKC                      | 1                      | 67        |
| G9c-De-NH2          | Analogue of Brevinine-1E-OG9 (Frog skin-derived AMP)                                                                 | FPLIARLAAKFLPKIL-NH2                             | 1                      | 67        |

|                                       |                                                                                                                       |                                                                                                                            |   |                  |
|---------------------------------------|-----------------------------------------------------------------------------------------------------------------------|----------------------------------------------------------------------------------------------------------------------------|---|------------------|
| C10-KR8d                              | Residues 18-29 of LL-37 (made of D-amino acids) linked to a C10 acyl chain                                            | KRIWQRIK                                                                                                                   | 1 | 115              |
| CA(1-7)M(2-9)NH <sub>2</sub>          | Cecropin A-melittin hybrid peptide                                                                                    | Sequence not shown in the available publication.                                                                           | 1 | 72               |
| Capitellacin                          | AMP from marine polychaeta <i>Capitella teleta</i> (annelide worm)                                                    | SPRVCIRVCRNGVCYRRCWG                                                                                                       | 1 | 107              |
| CD4-PP                                | Synthetic AMP made by dimerization and backbone cyclization of LL-37-derived peptide KR-12                            | AGGKRIVKRIKKFLRGAG<br>GKRIVKRIKKFLRG                                                                                       | 1 | 117              |
| Cecropin A (CecA)                     | Synthetic AMP corresponding to a peptide from the greater wax moth <i>Galleria mellonella</i>                         | KWKIFKKIEKAGRNIRDGI<br>IKAGPAVSVVGEAATYKT<br>G                                                                             | 4 | 12, 90, 118, 142 |
| Ceragenin CSA-13                      | Synthetic AMPs derived from common bile acids                                                                         | NOA                                                                                                                        | 1 | 118              |
| Ceragenin CSA-90                      | Synthetic AMPs derived from common bile acids                                                                         | NOA                                                                                                                        | 1 | 118              |
| CGA-N9-C8                             | Analogue of AMP CGA-N9 derived from the N-terminus of human chromogranin A                                            | N-octanoic-RILSILRHQ                                                                                                       | 1 | 84               |
| Chol-37(F34-R)                        | Cholesterol-modified AMP PMAP-37(F34-R) derived from PMAP-37 from porcine myeloma cells                               | GLLSRLRDFLSDRGRRLGE<br>KIERIGQKIKDLSERFQS                                                                                  | 1 | 42               |
| Citropin 1.1                          | AMP produced by both the dorsal and submental glands of the Australian green tree frog <i>Litoria citropa</i>         | GLFDVIKKVASVIGGL-NH <sub>2</sub>                                                                                           | 1 | 72               |
| cLFchimera                            | Heterodimeric peptide designed to mimic two antimicrobial domains, Lactoferricin (LFcin) and Lactoferrampin (LFampin) | Sequence not shown in the available publication.                                                                           | 1 | 97               |
| Cnt[15-34]                            | C-terminal part of the AMP Crotalicidin derived from rattlesnake venom                                                | KKRLKKIFKKPMVIGVTIP<br>F                                                                                                   | 1 | 82               |
| Colistin (Polymyxin E)                | AMP produced by <i>Bacillus polymyxa</i>                                                                              | Sequence not shown in the available publication. Complicated structure involving multiple Dab ( <a href="#">AP02204</a> )* | 1 | 16, 48           |
| CRAMP                                 | Mouse AMP                                                                                                             | Sequence not shown in the available publication. 33 amino acids ( <a href="#">AP00281</a> )*                               | 1 | 57               |
| Crustin                               | AMP isolated from Green tiger shrimp <i>Penaeus semisulcatus</i>                                                      | Sequence not shown in the available publication. 83 amino acids ( <a href="#">AP01555</a> )*                               | 1 | 105              |
| D51-derivatives D51-P11G and D51-P11K | Derivatives of synthetic AMP D51                                                                                      | FLFRVASKVFGALIGKFKK<br>K and<br>FLFRVASKVFKALIGKFKK<br>K                                                                   | 1 | 93               |

|                                                        |                                                                                                                                   |                                                                                                   |   |                       |
|--------------------------------------------------------|-----------------------------------------------------------------------------------------------------------------------------------|---------------------------------------------------------------------------------------------------|---|-----------------------|
| DASamP1<br>(database-screened antimicrobial peptide 1) | Synthetic AMP                                                                                                                     | FFGKVLKLRKIF                                                                                      | 2 | 137,139               |
| D-CONGA-Q7                                             | AMP variant of the synthetic AMP D-amino acid CONsensus with Glycine Absent (D-CONGA)                                             | RRWARRQLAFAFR                                                                                     | 1 | 113                   |
| Defensin-1                                             | Derived from exosomes from honeybee honey <i>Apis mellifera</i>                                                                   | Sequence not shown in the available publication.<br>95 amino acids according to P17722 (UniProt)* | 1 | 76                    |
| D-GL13K                                                | Synthetic AMP derived from the human salivary protein BPIFA2                                                                      | GKIIKLKASLKLL                                                                                     | 1 | 36                    |
| DP7                                                    | In-silico designed synthetic peptide                                                                                              | VQWRIRVAVIRK                                                                                      | 2 | 61, 95                |
| DSPE-HnMc                                              | Chimeric antimicrobial lipopeptide                                                                                                | NOA                                                                                               | 1 | 28                    |
| E6                                                     | Synthetic AMP                                                                                                                     | RRWRIVVIRVRRC                                                                                     | 1 | 34                    |
| ε-PL (EPL, Epsilon poly-L-Lysine)                      | Naturally occurring AMP (originally discovered as a secreted product in actinomyces)                                              | Sequence not shown in the available publication.                                                  | 1 | 15                    |
| Gaduscidin-1                                           | Natural AMP derived from atlantic cod ( <i>Gadus morhua</i> )                                                                     | Sequence not shown in the available publication.                                                  | 1 | 60                    |
| GA-KR12                                                | Synthetic AMP produced by fusing gallic acid (GA) to KR12, a peptide derived from LL-37                                           | Gallic acid-KRIVQRIKDFLR                                                                          | 1 | 116                   |
| Gallidermin                                            | <i>Staphylococcus gallinarum</i> -derived lanthionine containing AMP (lantibiotic)                                                | MEKFNNDFNLDVTVSKD<br>DAKKADVKITSKSLCTPG<br>CVTGLLMGCAGSSATCNC<br>SVHVG                            | 1 | 47                    |
| GH12                                                   | Synthetic AMP                                                                                                                     | GLLWHLLHLLH                                                                                       | 4 | 14, 50, 120, 121, 145 |
| Halictine-2 analogue                                   | synthetically prepared analogue of the natural AMP halictine-2 isolated from venom of the eusocial bee <i>Halictus sexcinctus</i> | GLWVKLLKKILK                                                                                      | 1 | 135                   |
| Haloganan (Hgn)                                        | Isoform of HG1, an AMP derived from halucidin                                                                                     | KWQNALLHHGLNCAKG<br>VLK                                                                           | 1 | 73                    |
| HBD2 (human beta-defensin 2)                           | Natural human AMP                                                                                                                 | GIGDPVTCLKSGAIC2HPV<br>FCPRRYKQIGTCGLPGTKC<br>CKKP                                                | 2 | 55, 56                |
| HBD3 (human beta-defensin 3)                           | Natural human AMP                                                                                                                 | GIINTLQKYCYRVRGGRC<br>AVLSCLPKEEQIGKCSTRG<br>RKCCRRKK                                             | 3 | 55, 56, 74            |
| Hc-CATH                                                | Cathelicidin Identified from the sea snake <i>Hydrophis cyanocinctus</i>                                                          | KFFKRLLKSVRRVKKFRK<br>KPRLIGLSTLL                                                                 | 1 | 138                   |
| HG-1                                                   | AMP derived from halocidin, a natural AMP in tunicates.                                                                           | KWLNALLHHGLNCAKG<br>VLA                                                                           | 1 | 73                    |

|                                   |                                                                                                                                        |                                                                                                                |   |          |
|-----------------------------------|----------------------------------------------------------------------------------------------------------------------------------------|----------------------------------------------------------------------------------------------------------------|---|----------|
| Hill-Cec1                         | Synthetic AMPs derived from black soldier fly <i>Hermetia illucens</i>                                                                 | SWWKVFKPVEKLGQRV<br>RDIQIGIGIAQQGANVL<br>ATVRGG                                                                | 1 | 103      |
| Hill-Cec10                        | Synthetic AMPs derived from black soldier fly <i>Hermetia illucens</i>                                                                 | RWYKKIFKPVEKAVQVR<br>DATLQALGVAQQAANVY<br>ATAQGA                                                               | 1 | 103      |
| HNP-1                             | Member of the $\alpha$ -defensin family found in the human respiratory tract                                                           | ACYCRIPACIAGERRYGTC<br>IYQGRWLWAFCC                                                                            | 1 | 49       |
| HNP-2                             | Members of the $\alpha$ -defensin family found in the human respiratory tract                                                          | CYCRIPACIAGERRYGTCT<br>YQGRWLWAFCC                                                                             | 1 | 49       |
| Jelleine-1 analogue 15            | Jelleine-1 was isolated from royal jelly of honeybees                                                                                  | PWRLRLRL                                                                                                       | 1 | 59       |
| Jellein-3                         | Derived from exosomes from honeybee honey <i>Apis mellifera</i>                                                                        | EPFKLSLHL                                                                                                      | 1 | 76       |
| JlChis-2                          | Synthetic AMP variant of Jelleine-1 from the royal jelly of <i>Apis mellifera iberiensis</i>                                           | PWRISIRLAAC                                                                                                    | 1 | 38       |
| K11                               | Synthetic AMP inspired by natural AMPs (cecropin A, melittin and maganin 2)                                                            | KWKSFIKKLTKKFLHSAK<br>KF                                                                                       | 1 | 16       |
| KP                                | Decapeptide derived from the sequence of the variable region of a single-chain recombinant anti-idiotypic antibody                     | AKVTMTCSAS                                                                                                     | 1 | 51       |
| KWI18                             | Synthetic AMP based on <i>in silico</i> cleavage of trypsin inhibitor isolated from <i>Inga laurina</i> seeds (ILTI)                   | KWIRRIIRDYKKFFIKFI                                                                                             | 1 | 123      |
| L18R                              | Translated product of immunoglobulin gene J (locus heavy, IGHJ2)                                                                       | LLVLRSLGPWHPGHCLLR                                                                                             | 2 | 51, 134  |
| L5K5W                             | Synthetic amphipathic $\alpha$ -helical AMP                                                                                            | KKLWKWLKKLL                                                                                                    | 2 | 137, 139 |
| LA-Bac8c                          | Synthetic AMP composed of lipoic acid (LA) linked to octapeptide Bac8c, a derivative from Bactenecin extracted from bovine neutrophils | lipoic acid (LA) or {5-(1,3-dithiolan-4-yl)pentanoic acid} linked to octapeptide Bac8c (RIWVIWRR)              | 1 | 114      |
| Lactoferrin (or Lactotransferrin) | Natural human AMP                                                                                                                      | Sequence not shown in the available publication. 710 amino acids according to <a href="#">Q2788</a> (UniProt)* | 1 | 79       |
| Lactoferricin (LfcinH)            | AMP derived from human lactoferrin through pepsin-mediated proteolysis                                                                 | TKCFQWQRNMRKVR-G-PPVSCIQRDS                                                                                    | 1 | 100      |
| Laterosporulin                    | Natural AMP from soil bacteria <i>Brevibacillus</i> spp.                                                                               | Sequence not shown in the available publication. 49 amino acids ( <a href="#">AP01963</a> )*                   | 1 | 39       |
| LF-1                              | Lactotransferrin-derived AMP                                                                                                           | WKLLRKAWKLLRKA                                                                                                 | 1 | 78       |

|                            |                                                                                            |                                                                                                                                                                                                                          |    |                                                         |
|----------------------------|--------------------------------------------------------------------------------------------|--------------------------------------------------------------------------------------------------------------------------------------------------------------------------------------------------------------------------|----|---------------------------------------------------------|
| Lf6-GG                     | Synthetic symmetric end AMP                                                                | RRWQWRGGRWQWRR                                                                                                                                                                                                           | 1  | 110                                                     |
| Lf6-pP                     | Synthetic symmetric end AMP                                                                | RRWQWRpPRWQWRR                                                                                                                                                                                                           | 1  | 110                                                     |
| LL-37                      | Natural human cathelicidin                                                                 | LLGDFFRKSKEKIGKEFKRIVQRIKDFLRNLPRTES                                                                                                                                                                                     | 13 | 13, 18, 45, 49, 62, 79, 89, 99, 100, 115, 117, 118, 129 |
| Lysozyme                   | Natural human AMP                                                                          | Sequence not shown in the available publication. 130 amino acids ( <a href="#">AP02257</a> )*                                                                                                                            | 3  | 52, 79, 89                                              |
| MAA-41                     | Hybrid AMP of BMAP28 (a bovine antimicrobial peptide of the cathelicidin family) and LL-37 | Sequence not shown in the available publication.                                                                                                                                                                         | 1  | 129                                                     |
| Magainin                   | AMP derived from the African clawed frog ( <i>Xenopus laevis</i> )                         | Sequence not shown in the available publication, unclear if the publication refers to Magainin 1 or 2 -<br>Magainin 1<br>GIGKFLHSAGKFGKAFVG<br>EIMKS (AnaSpec)*;<br>Magainin-2<br>GIGKFLHSAKKFGKAFVG<br>EIMNS (AnaSpec)* | 1  | 118                                                     |
| Mag2 (Magainin 2)          | AMP derived from the skin of African clawed frog ( <i>Xenopus laevis</i> )                 | GIGKFLHSAKKFGKAFVG<br>EIMNS                                                                                                                                                                                              | 1  | 92                                                      |
| Mag2-17base                | AMP derivative from Magainin 2 from the African clawed frog ( <i>Xenopus laevis</i> )      | GIGKFLHSAKKFGKAFV                                                                                                                                                                                                        | 1  | 92                                                      |
| Melimine                   | Chimeric AMP from melittin (see table 1) and protamine (AAMP extracted from fish milt)     | TLISWIKNKRKQRPRVSRR<br>RRRRGGRRRR                                                                                                                                                                                        | 1  | 58                                                      |
| Melittin                   | Natural AMP derived from venom of the European honey bee <i>Apis mellifera</i>             | GIGAVLKVLTTGLPALISWIKRKRQQ                                                                                                                                                                                               | 1  | 22                                                      |
| MeIm-3.1-PP4               | AMP derived from conjugation of methylimidazolium IL and synthetic AMP 3.1-PP4             | Methylimidazolium IL coupled to the N-terminus of peptide 3.1-PP4 (KKLLKWLLKLLKTTKS)                                                                                                                                     | 1  | 43                                                      |
| MK58911-NH2<br>MK58911-NH2 | Analogue from wasp peptide toxins                                                          | INWLKIAKKVKGML<br>INWLHIAHHVHGML                                                                                                                                                                                         | 1  | 88                                                      |
| MPX (mastoparan-X)         | AMP isolated from wasp venom                                                               | INWKGIAAMAKKLL                                                                                                                                                                                                           | 2  | 65, 96                                                  |
| MRJP-1                     | Derived from exosomes from honeybee honey <i>Apis mellifera</i>                            | Sequence not shown in the available publication. 432 amino acids according to <a href="#">Q18330</a> (UniProt)*                                                                                                          | 1  | 76                                                      |
| Nisin                      | Natural AMP (lantibiotic) from <i>Lactococcus lactis</i>                                   | Sequence not shown in the available publication. 57                                                                                                                                                                      | 5  | 15, 35, 46, 77, 93                                      |

|                            |                                                                                                                                        |                                                                                                                                                                                                                                                                       |   |     |
|----------------------------|----------------------------------------------------------------------------------------------------------------------------------------|-----------------------------------------------------------------------------------------------------------------------------------------------------------------------------------------------------------------------------------------------------------------------|---|-----|
|                            |                                                                                                                                        | amino acids according to<br><a href="#">P13068</a> (UniProt)*                                                                                                                                                                                                         |   |     |
| NK2A                       | Synthetic AMP based on bovine NK-lysin                                                                                                 | TVIEVASKMCSKMRLKGLCKSITKRFLRR                                                                                                                                                                                                                                         | 1 | 92  |
| Octominin                  | Synthetic AMP based on a defense protein of <i>Octopus minor</i>                                                                       | Sequence not shown in the available publication.<br>GWLIRGAIHAGKAIHGLIHRRRH<br>(DOI: 10.3390/md18010056)*                                                                                                                                                             | 1 | 20  |
| OctoPartenopin (P0)        | Natural AMP extracted from suckers of <i>Octopus vulgaris</i>                                                                          | AGTNK                                                                                                                                                                                                                                                                 | 1 | 125 |
| Octopromycin               | AMP derived from proline-rich protein 5 gene of <i>Octopus minor</i>                                                                   | Sequence not shown in the available publication.<br>RRLIRTDGPIIYDYFKDQL<br>LKKGMVILRESMKNLKGM<br>(DOI: 10.1016/j.fsi.2021.07.019)*                                                                                                                                    | 1 | 106 |
| OH-CATH-30                 | Fragment of OH-CATH missing 4 N-terminal amino acids, originally identified in king cobra ( <i>Ophiophagus hannah</i> )                | KFFKKLKNSVKKRAKKFF<br>KKPRVIGVSIPF                                                                                                                                                                                                                                    | 1 | 141 |
| P5                         | Synthetic AMP                                                                                                                          | RIVQRIKKWLLKWKKLGY                                                                                                                                                                                                                                                    | 1 | 136 |
| P6.2                       | Synthetic AMP                                                                                                                          | GLLRKWGKKWKEFLRRV<br>WK                                                                                                                                                                                                                                               | 1 | 136 |
| P12                        | Synthetic AMP                                                                                                                          | GWHHFFHFFHFF                                                                                                                                                                                                                                                          | 1 | 75  |
| PE2 26                     | Linear, fatty acid bearing AMP derivatives of PE2 (AMP isolated from <i>Paenibacillus ehimensis</i> B7)                                | C7-Dab-Ile-Dab-d-Phe-Leu-Dab-d-Val-Leu-Tyr                                                                                                                                                                                                                            | 1 | 127 |
| PE2 27                     | Linear, fatty acid bearing AMP derivate of PE2 (AMP isolated from <i>Paenibacillus ehimensis</i> B7)                                   | C8-Dab-Ile-Dab-d-Phe-Leu-Dab-d-Val-Leu-Tyr                                                                                                                                                                                                                            | 1 | 127 |
| Pep6                       | Synthetic AMP                                                                                                                          | RLRWWRRLR                                                                                                                                                                                                                                                             | 1 | 130 |
| Phormicin C-NS             | AMP from housefly ( <i>Musca domestica</i> ) larval                                                                                    | Sorbic acid-<br>ATCDLLSGTGVGHSACAA<br>HCLLRGNRGG<br>YCNGKGVVCVRN                                                                                                                                                                                                      | 1 | 81  |
| Piscidin 1 (SBP1 and WBP1) | Synthetic AMP analogues of striped bass ( <i>Morone saxatilis</i> ) and white bass ( <i>M. chrysops</i> ) piscidin 1, class I piscidin | Sequence not shown in the available publication.<br>SBP1:<br>MKCATLELVLSMVVLM<br>EPGDAFFHHIFRGIVHVG<br>KTIHRLVTGGKAEQDQQD<br>QQYQQEQQERRAQQYQR<br>ENRERAAFD<br>WBP1:<br>MKCATLSLVLSMVVLM<br>EPGDAFFHHIFRGIVHVG<br>KTIHKLVTGGKAEQDQQ<br>DQQY2QDQQDQQAQQY<br>QRENREAAFD | 1 | 109 |

|                      |                                                                                                                                         |                                                                                                                                                                                                                                                                                                                                                                                           |   |                         |
|----------------------|-----------------------------------------------------------------------------------------------------------------------------------------|-------------------------------------------------------------------------------------------------------------------------------------------------------------------------------------------------------------------------------------------------------------------------------------------------------------------------------------------------------------------------------------------|---|-------------------------|
|                      |                                                                                                                                         | (DOI: 10.1371/journal.pone.0159423)*                                                                                                                                                                                                                                                                                                                                                      |   |                         |
| Piscidin 3 (SB/WBP3) | Synthetic AMP analogue of hybrid striped / white bass ( <i>M. Chrysops</i> x <i>M. saxatili</i> ) piscidin 3, class I piscidin          | Sequence not shown in the available publication.<br>MRCITLVLVLSMVVLMAE<br>PGDAFIHHIERGIVHAGRS<br>IGRELTGGKAQQR<br>EQQDeREMDRERDAEN<br>(DOI: 10.1371/journal.pone.0159423)*                                                                                                                                                                                                                | 1 | 109                     |
| Piscidin 4 (SBP4)    | Synthetic AMP analogue of striped bass ( <i>M. saxatilis</i> ) piscidin 4, class II piscidin                                            | Sequence not shown in the available publication.<br>MKCVMIFLVLTLLVVLMAE<br>PGEGERHLERGAKAIFRG<br>ARQGWRAHKVVSRYRNR<br>DVPETDNNQEEFYNNQR<br>(DOI: 10.1371/journal.pone.0159423)*                                                                                                                                                                                                           | 1 | 109                     |
| Piscidin 5 (WBP5)    | Synthetic AMP analogue of white bass ( <i>M. Chrysops</i> ) piscidin 5, class II piscidin                                               | Sequence not shown in the available publication.<br>MKCVMIFLVLTLLVVLMAE<br>PGEGLIGSLERGAKAIERG<br>ARQGWRSKAVSRYRAR<br>YVRRPVIIYHRVYPNEER<br>(DOI: 10.1371/journal.pone.0159423)*                                                                                                                                                                                                          | 1 | 109                     |
| PO3 (PEIg-PLO20)     | Synthetic, star-shaped AMP with a PEI (polyethylenimine-g-poly (l-ornithine)) core and approximately eight surface primary amino groups | polyethylenimine-g-poly(l-ornithine) PEIg-PLO20                                                                                                                                                                                                                                                                                                                                           | 1 | 112                     |
| Polymyxin B          | Natural AMP from <i>Bacillus polymyxa</i>                                                                                               | Sequence not shown in the available publication.<br>N-[4-amino-1-[[1-[[4-amino-1-oxo-1-[[6,9,18-tris(2-aminoethyl)-15-benzyl-3-(1-hydroxyethyl)-12-(2-methylpropyl)-2,5,8,11,14,17,20-hepta-oxo-1,4,7,10,13,16,19-heptazacyclotricos-21-yl]amino]butan-2-yl]amino]-3-hydroxy-1-oxobutan-2-yl]amino]-1-oxobutan-2-yl]-6-methyloctanamide-sulfuric acid<br>(CAS registry number 1404-26-8)* | 6 | 11, 21, 48, 49, 52, 130 |
| Pom-1                | AMP derived from Cuban freshwater snail ( <i>Pomacea poeyana</i> )                                                                      | Sequence not shown in the available publication.                                                                                                                                                                                                                                                                                                                                          | 1 | 87                      |

|                         |                                                                                                          |                                                                                                                                                                     |   |         |
|-------------------------|----------------------------------------------------------------------------------------------------------|---------------------------------------------------------------------------------------------------------------------------------------------------------------------|---|---------|
|                         |                                                                                                          | KCAGSIAWAIGSGLFGGA<br>KLIKIKKYIAELGGLQ<br>(DOI: 10.3390/pathogens10040496)*                                                                                         |   |         |
| Pom-2                   | AMP derived from Cuban freshwater snail ( <i>Pomacea poeyana</i> )                                       | Sequence not shown in the available publication.<br>KEIERAGQRIRDAIISAAPA<br>VETLAQAQKIIKGG<br>(DOI: 10.3390/pathogens10040496)*                                     | 1 | 87      |
| Ponericin G1            | AMP derived from venom of the predator ant <i>Pachycondyla goeldii</i>                                   | NOA.<br>GWKDWAKKAGGWLKKK<br>GPGMAKAALKAAMQ<br>(DOI: 10.1074/jbc.M100216200)*                                                                                        | 1 | 32      |
| PLL (Poly-L-Lysine)     | Naturally occurring AMP                                                                                  | Sequence not shown in the available publication.<br>(C <sub>6</sub> H <sub>14</sub> N <sub>2</sub> O <sub>2</sub> ) <sub>x</sub><br>CAS registry number 25104-18-1* | 1 | 24      |
| Protamine               | AMP isolated from salmon sperm ( <i>Salmo salmine</i> )                                                  | MPRRRRSSSRPVRRRRRPR<br>VSRRRRRRGRRRR                                                                                                                                | 1 | 141     |
| Pt5-1c                  | Derivate of Pt5, an AMP derived from zebrafish ( <i>Danio rerio</i> ) phosvitin                          | Sequence not shown in the available publication.<br>SRMKKWAKIIEKWRKWH<br>KKRWLAHHSATK (DOI: 10.1016/j.fsi.2018.03.031)*                                             | 1 | 17      |
| Q4-15-a1                | Synthetic AMP derivative of GW-Q4                                                                        | KKFATIAKKFINKLW                                                                                                                                                     | 1 | 53      |
| Random                  | Synthetic AMP                                                                                            | KKKLAKLKLGA KLKLGK<br>LGA                                                                                                                                           | 1 | 92      |
| r(P)ApoBLPro            | AMP derived from an antimicrobial region encrypted in the sequence of human apolipoprotein B             | Sequence not shown in the available publication.<br>PHVALKPGKLKFIIPSPKRP<br>VKLLSGGNTLHLVSTTKT<br>(DOI: 10.3390/ph14070631)*                                        | 1 | 40      |
| RRP9W4N                 | Synthetic peptide derived from human proline arginine-rich end leucine-rich repeat protein (PRELP)       | RRPRPRRPWWWW                                                                                                                                                        | 1 | 37      |
| rScyreprocin            | Recombinant AMP derived from natural AMP isolated from the gonads of mud crab <i>Scylla paramamosain</i> | MKEDSNILDKTAKMTKQ<br>NKALLFTAGGAAAFMAG<br>YYYYHCNYRNPAPKSGS<br>TTSQDKTDAQAVQSIPSPS<br>GNKGKESKDPKVK                                                                 | 1 | 126     |
| S6L3-33                 | Synthetic AMP                                                                                            | FKKFWKWFRRF                                                                                                                                                         | 2 | 137,139 |
| S100A12 (calgranulin C) | Natural human AMP                                                                                        | Sequence not shown in the available publication.<br>92 amino acids according to P80511 (UniProt)*                                                                   | 1 | 54      |



|                                    |                                                                                                                                                          |                                                                                                                                                                                    |   |     |
|------------------------------------|----------------------------------------------------------------------------------------------------------------------------------------------------------|------------------------------------------------------------------------------------------------------------------------------------------------------------------------------------|---|-----|
| SAAP-148                           | Synthetic AMP                                                                                                                                            | LKRVWKR VFKLLKRYWR<br>QLKKPVR                                                                                                                                                      | 1 | 23  |
| SAMP-A4-C8                         | Synthetic AMP                                                                                                                                            | n-octanoic-VRLRRRI                                                                                                                                                                 | 1 | 69  |
| SMAP-29                            | AMP derived from sheep cathelicidin                                                                                                                      | Sequence not shown in the available publication.<br>RGLRRLGRKIAHGVKKYG<br>PTVLRIRIA (DOI:<br>10.1007/s00726-016-2170-y )*                                                          | 1 | 45  |
| Spa31                              | Truncated peptide derived from Spampcin, an AMP from Marine mud crab <i>Scylla paramamosain</i>                                                          | RRAAHGLLPRLRAPPPFH<br>KRCVCLCRTAPPP                                                                                                                                                | 1 | 132 |
| Sp-LECin                           | Truncated peptide derived from the mature peptide of SpCTL6, a c-type lectin homologue from the Marine mud crab <i>Scylla paramamosain</i>               | GCVFLLPAKPHNYKKVFL<br>SKGV                                                                                                                                                         | 1 | 124 |
| SS-BF-3                            | Synthetic AMP                                                                                                                                            | NOA                                                                                                                                                                                | 1 | 131 |
| Stripe                             | Synthetic AMP                                                                                                                                            | KLLKKAGKLLKKAGKLLK<br>KAG                                                                                                                                                          | 1 | 92  |
| SynPG-1                            | Hybrid AMP based on Protegrin-1, a porcine cathelicidin                                                                                                  | GLRLLLRKIRGRWKGGGR<br>GGRLCYCRRRFCVCVGR                                                                                                                                            | 1 | 31  |
| TAT-RasGAP317-326                  | Chimeric AMP made of the cell-permeable HIV peptide TAT48-57 linked to a 10-amino acid sequence of the Src Homology 3 Domain (SH3 domain) of p120 RasGAP | RRRQRRKKRGGDTRLNT<br>VWMW                                                                                                                                                          | 1 | 122 |
| TC-19                              | Synthetic AMP derived from human thrombocidin-1-derived peptide L3                                                                                       | LRCMCIKWWSGKHPK                                                                                                                                                                    | 1 | 101 |
| Temporin A                         | AMP derived from the European red frog <i>Rana temporaria</i>                                                                                            | FLPLIGRVLSGIL                                                                                                                                                                      | 1 | 72  |
| Temporin G                         | AMP derived from the European red frog <i>Rana temporaria</i>                                                                                            | FFPVIGRILNGIL                                                                                                                                                                      | 1 | 68  |
| TL (Temporin L)                    | AMP derived from the European red frog <i>Rana temporaria</i>                                                                                            | FVQWFSKFLGRIL                                                                                                                                                                      | 1 | 19  |
| ToAP2                              | AMP derived from scorpion <i>Tityus obscurus</i> venom                                                                                                   | FFGTLFKLGSKLIPGVMKL<br>FSKKKER                                                                                                                                                     | 1 | 83  |
| TP4 peptide analogues, dN4 and dC4 | Analogues from piscidin-like AMP TP4 of Nile tilapia, <i>Oreochromis niloticus</i>                                                                       | TP4:<br>FIHHIIIGGLFSAGKAIHRLI<br>RRRRR<br>Sequence of analogues not shown in the available publication.<br>dN4:<br>IIGGLFSAGKAIHRLIRRRR<br>R<br>dC4:<br>FIHHIIIGGLFSAGKAIHRLI<br>R | 1 | 91  |

|               |                                                                                                                                                |                                                                                                                   |   |        |
|---------------|------------------------------------------------------------------------------------------------------------------------------------------------|-------------------------------------------------------------------------------------------------------------------|---|--------|
|               |                                                                                                                                                | (doi: 10.1371/journal.pone.0186442)*                                                                              |   |        |
| vCPP2319      | Torque virus capsid protein-derived polycationic peptide                                                                                       | WRRRYRRWRRRRRWRRR<br>PRR                                                                                          | 1 | 66     |
| W379          | Synthetic AMP                                                                                                                                  | Sequence not shown in the available publication.<br>RRRWWWV (DOI: 10.1002/adfm.202206936)*                        | 2 | 30, 33 |
| WLBU2         | Synthetic AMP                                                                                                                                  | RRWVRRVRRVWRRVVRV<br>VRRWVRR                                                                                      | 1 | 111    |
| YS12          | AMP derived from <i>Bacillus velezensis</i>                                                                                                    | Sequence not shown in the available publication.                                                                  | 1 | 128    |
| ZN-5          | Synthetic Oreoch-2 analogue; Oreoch-2 (or TP4 piscidin) is an AMP derived from tilapia ( <i>Oreochromis niloticus</i> )                        | FIIGGLFSAGKAHRLIRRR<br>RR                                                                                         | 1 | 108    |
| ZN-6          | Synthetic Oreoch-2 analogue; Oreoch-2 (or TP4 piscidin) is an AMP derived from tilapia ( <i>Oreochromis niloticus</i> )                        | FLFSAGKAHRLIRRRRR                                                                                                 | 1 | 108    |
| 7e-SMAMP      | Synthetic cationic amphipathic barbiturate                                                                                                     | Guanidine barbiturate                                                                                             | 1 | 27     |
| 15c           | Synthetic AMP; quaternary ammonium iodide salt of a biphenylglyoxamide derivative                                                              | 3-(2-(4'-Chloro-4-(octylsulfonamido)-[1,1'-biphenyl]-3-yl)-2-oxoacetamido)-N,N,N-trimethylpropan-1-aminium iodide | 1 | 119    |
| 17base-Aib    | AMP derivative from Magainin 2 from the African clawed frog ( <i>Xenopus laevis</i> ) with 2-aminoisobutyric acid (Aib) insertion              | GIGKFLHSUKKFGKUFV                                                                                                 | 1 | 92     |
| 17base- Ac6c  | AMP derivative from Magainin 2 from the African clawed frog ( <i>Xenopus laevis</i> ) with 2 1-aminocyclohexylcarboxylic acid (Ac6c) insertion | GIGKFLHSZKKFGKZFV                                                                                                 | 1 | 92     |
| 17base-Hybrid | AMP derivative from Magainin 2 from the African clawed frog ( <i>Xenopus laevis</i> ) with lysine insertion                                    | GIKKFLKSZKKFVKZFK                                                                                                 | 1 | 92     |
| 1018-k6       | <i>In silico</i> designed AMP                                                                                                                  | VRLIVLVRIWRR                                                                                                      | 1 | 71     |
| 1018M         | Mutated version of the innate defense regulator peptide (IDR-1018)                                                                             | VRLRWRRRRWRR                                                                                                      | 1 | 63     |
| III5          | Neolignan-AMP Mimic Conjugate                                                                                                                  | Sequence not shown in the available publication.                                                                  | 1 | 41     |
| III15         | Neolignan-AMP Mimic Conjugate                                                                                                                  | Sequence not shown in the available publication.                                                                  | 1 | 41     |

|                                                      |                                              |                                                  |   |                           |
|------------------------------------------------------|----------------------------------------------|--------------------------------------------------|---|---------------------------|
| Not immediately available in Abstract or Publication | (Synthetic) AMPs without further information | Sequence not shown in the available publication. | 5 | <b>25, 26, 29, 44, 98</b> |
|------------------------------------------------------|----------------------------------------------|--------------------------------------------------|---|---------------------------|

NOA = No access to full publication (e.g., not an Open Access publication).

\* = Extra information complete with its accompanying reference.
